# Supplementary material for: The Transcriptome of Bathymodiolus azoricus Gill Reveals Expression of Genes from Endosymbionts and Free-Living Deep-Sea Bacteria
Source: Mar Drugs. 2012 Aug 20;10(8):1765–83. doi: 10.3390/md10081765 (PMC3447338; doi:10.3390/md10081765)
Supplement: Supplementary File 1: — PDF-Document (PDF, 407 KB) [file marinedrugs-10-01765-s001.pdf]

## Supplementary Information

**Table S1.** Distribution of transcripts annotated according to the SEED subsystems in MG-RAST. Transcript gene function was assigned in MG-RAST, with the following parameters: maximum e-value of  $10^{-5}$ , minimum of 50% identity cutoff and minimum alignment cutoff of 50.

| Subsystem Hierarchy 1       | Subsystem Hierarchy 2                       | Subsystem Name                                                                                                 | # transcripts |
|-----------------------------|---------------------------------------------|----------------------------------------------------------------------------------------------------------------|---------------|
| Amino Acids and Derivatives | Alanine, serine, and glycine                | Alanine biosynthesis                                                                                           | 1             |
|                             |                                             | Glycine Biosynthesis                                                                                           | 1             |
|                             |                                             | Glycine cleavage system                                                                                        | 2             |
|                             |                                             | Serine Biosynthesis                                                                                            | 1             |
|                             | Arginine; urea cycle, polyamines            | Arginine Biosynthesis                                                                                          | 8             |
|                             |                                             | Polyamine Metabolism                                                                                           | 2             |
|                             |                                             | Urea decomposition                                                                                             | 1             |
|                             |                                             | Aromatic amino acid degradation                                                                                | 1             |
|                             | Aromatic amino acids and derivatives        | Chorismate: Intermediate for synthesis of PAPA antibiotics, PABA, anthranilate, 3-hydroxyanthranilate and more | 2             |
|                             |                                             | Chorismate Synthesis                                                                                           | 6             |
|                             |                                             | Common Pathway For Synthesis of Aromatic Compounds (DAHP synthase to chorismate)                               | 13            |
|                             |                                             | Phenylalanine synthesis                                                                                        | 2             |
|                             | Branched-chain amino acids                  | Tryptophan synthesis                                                                                           | 5             |
|                             |                                             | Branched-Chain Amino Acid Biosynthesis                                                                         | 10            |
|                             |                                             | HMG CoA Synthesis                                                                                              | 1             |
|                             |                                             | Valine degradation                                                                                             | 1             |
|                             | Histidine Metabolism                        | Histidine Biosynthesis                                                                                         | 6             |
|                             |                                             | Cysteine Biosynthesis                                                                                          | 5             |
|                             | Lysine, threonine, methionine, and cysteine | Lysine Biosynthesis DAP Pathway                                                                                | 3             |
|                             |                                             | Methionine Biosynthesis                                                                                        | 8             |
|                             |                                             | Methionine Degradation                                                                                         | 4             |
|                             |                                             | Threonine and Homoserine Biosynthesis                                                                          | 9             |
|                             |                                             | Threonine degradation                                                                                          | 1             |
|                             |                                             | Choline and Betaine Uptake and Betaine Biosynthesis                                                            | 1             |
|                             | Osmotic stress                              |                                                                                                                |               |
|                             | Proline and 4-hydroxyproline                | Proline, 4-hydroxyproline uptake and utilization                                                               | 1             |

Table S1. Cont.

|               |                                 |                                                                |    |
|---------------|---------------------------------|----------------------------------------------------------------|----|
| Carbohydrates | Aminosugars                     | Chitin and N-acetylglucosamine utilization                     | 15 |
|               | CO <sub>2</sub> fixation        | CO <sub>2</sub> uptake, carboxysome                            | 8  |
|               |                                 | Calvin-Benson cycle                                            | 7  |
|               | Carbohydrates                   | beta-glucuronide utilization                                   | 1  |
|               |                                 | Dehydrogenase complexes                                        | 6  |
|               |                                 | Dihydroxyacetone kinases                                       | 1  |
|               |                                 | Entner-Doudoroff Pathway                                       | 6  |
|               |                                 | Glycolate, glyoxylate interconversions                         | 5  |
|               |                                 | Methylglyoxal Metabolism                                       | 1  |
|               | Central carbohydrate metabolism | Pentose phosphate pathway                                      | 7  |
|               |                                 | Pyruvate:ferredoxin oxidoreductase                             | 7  |
|               |                                 | Pyruvate Alanine Serine Interconversions                       | 1  |
|               |                                 | Pyruvate metabolism I: anaplerotic reactions, PEP              | 2  |
|               |                                 | Pyruvate metabolism II: acetyl-CoA, acetogenesis from pyruvate | 6  |
|               |                                 | TCA Cycle                                                      | 1  |
|               | Clustering-based subsystems     | Cluster Ytf and putative sugar transporter                     | 1  |
|               |                                 | Putative sugar ABC transporter (ytf cluster)                   | 1  |
|               |                                 | Lactose and Galactose Uptake and Utilization                   | 6  |
|               | Di- and oligosaccharides        | Maltose and Maltodextrin Utilization                           | 3  |
|               |                                 | Sucrose Metabolism                                             | 3  |
|               |                                 | Acetoin, butanediol metabolism                                 | 1  |
|               | Fermentation                    | Acetyl-CoA fermentation to Butyrate                            | 1  |
|               |                                 | Fermentations: Mixed acid                                      | 1  |
|               |                                 | D-gluconate and ketogluconates metabolism                      | 3  |
|               |                                 | D-ribose utilization                                           | 1  |
|               |                                 | Deoxyribose and Deoxynucleoside Catabolism                     | 9  |
|               | Monosaccharides                 | L-Arabinose utilization                                        | 1  |
|               |                                 | L-fucose utilization temp                                      | 6  |
|               |                                 | Mannose Metabolism                                             | 1  |
|               |                                 | Xylose utilization                                             | 2  |
|               | One-carbon Metabolism           | Methanogenesis                                                 | 2  |
|               |                                 | Serine-glyoxylate cycle                                        | 7  |
|               | Organic acids                   | Glycerate metabolism                                           | 1  |
|               |                                 | Glyoxylate Synthesis                                           | 2  |
|               | Sugar alcohols                  | Glycerol and Glycerol-3-phosphate Uptake and Utilization       | 1  |
|               |                                 | Hexitol degradation                                            | 1  |

Table S1. Cont.

|                              |                                                                                                                                                       |                                                                |    |
|------------------------------|-------------------------------------------------------------------------------------------------------------------------------------------------------|----------------------------------------------------------------|----|
| Cell Division and Cell Cycle | Cell cycle in Prokaryota                                                                                                                              | Bacterial Cell Division                                        | 9  |
|                              |                                                                                                                                                       | Bacterial Cytoskeleton                                         | 19 |
|                              |                                                                                                                                                       | Two cell division clusters relating to chromosome partitioning | 3  |
| Cell Wall and Capsule        | Capsular and extracellular polysacchrides                                                                                                             | CMP-N-acetylneuraminate Biosynthesis                           | 1  |
|                              |                                                                                                                                                       | Colanic acid biosynthesis                                      | 1  |
|                              |                                                                                                                                                       | O-Methyl Phosphoramidate Capsule Modification in Campylobacter | 1  |
|                              |                                                                                                                                                       | Rhamnose containing glycans                                    | 3  |
|                              |                                                                                                                                                       | Sialic Acid Metabolism                                         | 1  |
|                              |                                                                                                                                                       | dTDP-rhamnose synthesis                                        | 2  |
|                              |                                                                                                                                                       | Peptidoglycan Biosynthesis                                     | 11 |
|                              | Cell Wall and Capsule                                                                                                                                 | UDP-N-acetylmuramate from Fructose-6-phosphate Biosynthesis    | 2  |
|                              |                                                                                                                                                       | YjeE                                                           | 3  |
|                              | Gram-Negative cell wall components                                                                                                                    | KDO2-Lipid A biosynthesis                                      | 8  |
|                              |                                                                                                                                                       | LOS core oligosaccharide biosynthesis                          | 4  |
|                              |                                                                                                                                                       | Lipid A-Ara4N pathway ( Polymyxin resistance )                 | 3  |
|                              |                                                                                                                                                       | Lipopolysaccharide assembly                                    | 5  |
|                              |                                                                                                                                                       | Teichoic and lipoteichoic acids biosynthesis                   | 3  |
|                              |                                                                                                                                                       | Teichuronic acid biosynthesis                                  | 1  |
| Clustering-based subsystems  | Biosynthesis of galactoglycans and related lipopolysaccharides<br>CRISPRs and associated<br>hypotheticals<br>Carotenoid biosynthesis<br>Cell Division | CBSS-258594.1.peg.3339                                         | 2  |
|                              |                                                                                                                                                       | CBSS-216592.1.peg.3534                                         | 1  |
|                              |                                                                                                                                                       | CBSS-320388.3.peg.3759                                         | 1  |
|                              |                                                                                                                                                       | CBSS-281309.1.peg.50                                           | 5  |
|                              |                                                                                                                                                       | CBSS-160492.1.peg.550                                          | 2  |
|                              |                                                                                                                                                       | CBSS-176279.3.peg.868                                          | 1  |
|                              |                                                                                                                                                       | CBSS-176280.1.peg.1561                                         | 4  |
|                              |                                                                                                                                                       | CBSS-176299.4.peg.1996                                         | 4  |
|                              | Clustering-based subsystems                                                                                                                           | CBSS-224911.1.peg.435                                          | 1  |
|                              |                                                                                                                                                       | CBSS-228410.1.peg.134                                          | 1  |
|                              |                                                                                                                                                       | CBSS-235.1.peg.567                                             | 3  |
|                              |                                                                                                                                                       | CBSS-243277.1.peg.4359                                         | 3  |
|                              |                                                                                                                                                       | CBSS-251221.1.peg.1863                                         | 2  |

Table S1. Cont.

|  |                                                                                |                                                                   |    |
|--|--------------------------------------------------------------------------------|-------------------------------------------------------------------|----|
|  |                                                                                | CBSS-257314.1.peg.752                                             | 4  |
|  |                                                                                | CBSS-261591.3.peg.3916                                            | 5  |
|  |                                                                                | CBSS-281090.3.peg.464                                             | 2  |
|  |                                                                                | CBSS-288681.3.peg.1039                                            | 2  |
|  |                                                                                | CBSS-290633.1.peg.1906                                            | 7  |
|  |                                                                                | CBSS-296591.1.peg.2330                                            | 3  |
|  |                                                                                | CBSS-312309.3.peg.1965                                            | 2  |
|  |                                                                                | CBSS-316057.3.peg.1294                                            | 24 |
|  |                                                                                | CBSS-316057.3.peg.563                                             | 1  |
|  |                                                                                | CBSS-316279.3.peg.746                                             | 1  |
|  |                                                                                | CBSS-320372.3.peg.6046                                            | 2  |
|  |                                                                                | CBSS-335283.3.peg.454                                             | 19 |
|  |                                                                                | CBSS-342610.3.peg.1794                                            | 6  |
|  |                                                                                | CBSS-345072.3.peg.1318                                            | 2  |
|  |                                                                                | CBSS-56780.10.peg.1536                                            | 1  |
|  |                                                                                | CBSS-630.2.peg.3360                                               | 1  |
|  | Clustering-based subsystems (continued)                                        | Conserved gene cluster associated with Met-tRNA formyltransferase | 4  |
|  |                                                                                | Conserved gene cluster possibly involved in RNA metabolism        | 2  |
|  |                                                                                | EC49-61                                                           | 2  |
|  |                                                                                | EC699-706                                                         | 1  |
|  |                                                                                | Putative heme transporter                                         | 1  |
|  | Cytochrome biogenesis                                                          | CBSS-196164.1.peg.461                                             | 1  |
|  | DNA polymerase III epsilon cluster                                             | CBSS-342610.3.peg.1536                                            | 14 |
|  | Fatty acid metabolic cluster                                                   | CBSS-218491.3.peg.427                                             | 9  |
|  |                                                                                | CBSS-246196.1.peg.364                                             | 4  |
|  | Hypothetical associated with RecF                                              | Hypothetical Coupled to RecF                                      | 1  |
|  | Hypothetical in Lysine biosynthetic cluster                                    | CBSS-323850.3.peg.3269                                            | 1  |
|  | Hypothetical lipase related to Phosphatidate metabolism                        | CBSS-316407.3.peg.1371                                            | 3  |
|  | Hypothetical protein possible functionally linked with Alanine-tRNA synthetase | CBSS-257314.1.peg.488                                             | 5  |

Table S1. Cont.

|                                                                        |                                                                                                  |    |
|------------------------------------------------------------------------|--------------------------------------------------------------------------------------------------|----|
| Isoprenoid/cell wall biosynthesis:                                     |                                                                                                  |    |
| PREDICTED UNDECAPRENYL                                                 |                                                                                                  |    |
| DIPHOSPHATE PHOSPHATASE                                                | CBSS-83331.1.peg.3039                                                                            | 7  |
| Lipoprotein B cluster                                                  | CBSS-221988.1.peg.2137                                                                           | 1  |
| PmbA Related Hypothetical                                              | PmbA and a Hypothetical Protein                                                                  | 1  |
| Probably GTP or GMP signaling related                                  | CBSS-176299.4.peg.1292                                                                           | 4  |
| Probably Pyrimidine biosynthesis-related                               | CBSS-306254.1.peg.1508                                                                           | 1  |
| Probably Ybbk-related hypothetical membrane proteins                   | CBSS-316057.3.peg.659                                                                            | 1  |
| Probably organic hydroperoxide resistance related hypothetical protein | CBSS-269482.1.peg.1294                                                                           | 3  |
| Protein export?                                                        | CBSS-393121.3.peg.2760                                                                           | 12 |
| Putative GGDEF domain protein related to agglutinin secretion          | CBSS-323850.3.peg.3284                                                                           | 3  |
| Putative associate of RNA polymerase sigma-54 factor rpoN              | CBSS-316057.3.peg.1308                                                                           | 3  |
| Putrescine/GABA utilization cluster-temporal,to add to SSs             | GABA and putrescine metabolism from cluters                                                      | 2  |
| Recombination related cluster                                          | CBSS-258594.1.peg.613                                                                            | 12 |
| Ribosomal Protein L28P relates to a set of uncharacterized proteins    | A Gram-positive cluster that relates ribosomal protein L28P to a set of uncharacterized proteins | 1  |
| Ribosome-related cluster                                               | A Gammaproteobacteria Cluster Relating to Translation                                            | 1  |
| TldD cluster                                                           | CBSS-138119.3.peg.2719                                                                           | 2  |
| Translation                                                            | CBSS-354.1.peg.2917                                                                              | 2  |
| Urate degradation                                                      | CBSS-326442.4.peg.1852                                                                           | 7  |
| tRNA sulfuration                                                       | CBSS-205922.3.peg.1809                                                                           | 3  |
|                                                                        | CBSS-89187.3.peg.2957                                                                            | 2  |

Table S1. Cont.

|                                                        |                                        |                                                             |    |
|--------------------------------------------------------|----------------------------------------|-------------------------------------------------------------|----|
| Cofactors, Vitamins,<br>Prosthetic Groups,<br>Pigments | Biotin                                 | Biotin biosynthesis                                         | 2  |
|                                                        | Coenzyme A                             | Coenzyme A Biosynthesis                                     | 3  |
|                                                        |                                        | 5-FCL-like protein                                          | 2  |
|                                                        |                                        | Folate Biosynthesis                                         | 16 |
|                                                        | Folate and pterines                    | Molybdopterin biosynthesis                                  | 4  |
|                                                        |                                        | Pterin metabolism 3                                         | 3  |
|                                                        |                                        | YgfZ                                                        | 4  |
|                                                        | Isoprenoids                            | Isoprenoid Biosynthesis                                     | 7  |
|                                                        | Lipoic acid                            | Lipoic acid metabolism                                      | 3  |
|                                                        | NAD and NADP                           | NAD and NADP cofactor biosynthesis global                   | 3  |
|                                                        | Pyridoxine                             | Pyridoxin (Vitamin B6) Biosynthesis                         | 2  |
|                                                        | Quinone cofactors                      | Menaquinone and Phylloquinone Biosynthesis                  | 1  |
|                                                        |                                        | Pyrroloquinoline Quinone biosynthesis                       | 1  |
|                                                        |                                        | Chlorophyll Degradation                                     | 1  |
|                                                        | Tetrapyrroles                          | Cobalamin synthesis                                         | 1  |
|                                                        |                                        | Coenzyme B12 biosynthesis                                   | 2  |
|                                                        |                                        | Heme and Siroheme Biosynthesis                              | 8  |
|                                                        | Thiamine and thiamine<br>pyrophosphate | Thiamin biosynthesis                                        | 2  |
| DNA Metabolism                                         | DNA Metabolism                         | DNA structural proteins, bacterial                          | 1  |
|                                                        |                                        | Restriction-Modification System                             | 13 |
|                                                        |                                        | YcfH                                                        | 1  |
|                                                        | DNA repair                             | DNA Repair Base Excision                                    | 3  |
|                                                        |                                        | DNA repair, UvrABC system                                   | 4  |
|                                                        |                                        | DNA repair, bacterial                                       | 1  |
|                                                        |                                        | DNA repair, bacterial RecFOR pathway                        | 2  |
|                                                        |                                        | Rad50-Mre11::SbcD-SbcC DNA Repair Module                    | 1  |
|                                                        | DNA replication                        | DNA-replication                                             | 15 |
|                                                        |                                        | DNA topoisomerases, Type II, ATP-dependent                  | 2  |
| Fatty Acids and Lipids                                 | Fatty Acids and Lipids                 | Polyhydroxybutyrate metabolism                              | 1  |
|                                                        | Fatty acids                            | Fatty Acid Biosynthesis FASII                               | 2  |
|                                                        | Phospholipids                          | Glycerolipid and Glycerophospholipid Metabolism in Bacteria | 3  |
| Macromolecular Synthesis                               | Control of Macromolecular<br>Synthesis | CBSS-243277.1.peg.511                                       | 1  |

Table S1. Cont.

|                                  |                                                          |                                                                        |   |
|----------------------------------|----------------------------------------------------------|------------------------------------------------------------------------|---|
| Membrane Transport               | ABC transporters                                         | ABC transporter tungstate (TC 3.A.1.6.2)                               | 1 |
|                                  | Lipoprotein sorting                                      | Lipoprotein sorting system                                             | 2 |
|                                  | Membrane Transport                                       | Transport of Zinc                                                      | 2 |
|                                  | Uni- Sym- and Antiporters                                | Na(+) H(+) antiporter                                                  | 6 |
| Metabolism of Aromatic Compounds | Metabolism of central aromatic intermediates             | Catechol branch of beta-ketoadipate pathway                            | 1 |
|                                  | Peripheral pathways for catabolism of aromatic compounds | Phenylacetate pathway of aromatic compound degradation                 | 1 |
|                                  |                                                          | Benzoate degradation                                                   | 1 |
|                                  |                                                          | Biphenyl Degradation                                                   | 1 |
| Miscellaneous                    | Miscellaneous                                            | Transporters In Models                                                 | 6 |
| Motility and Chemotaxis          | Flagellar motility in Prokaryota                         | Flagellum                                                              | 6 |
|                                  | Social motility and nonflagellar swimming in bacteria    | Bacterial motility:Gliding                                             | 3 |
|                                  |                                                          | Ammonia assimilation                                                   | 1 |
| Nitrogen Metabolism              | Nitrogen Metabolism                                      | Denitrification                                                        | 1 |
|                                  |                                                          | Nitrate and nitrite ammonification                                     | 5 |
|                                  |                                                          | Nudix proteins (nucleoside triphosphate hydrolases)                    | 3 |
| Nucleosides and Nucleotides      | Detoxification                                           | De Novo Pyrimidine Synthesis                                           | 6 |
|                                  | Nucleosides and Nucleotides                              | Hydantoin metabolism                                                   | 1 |
|                                  |                                                          | Purine Utilization                                                     | 3 |
|                                  |                                                          | Ribonucleotide reduction                                               | 7 |
|                                  | Purines                                                  | De Novo Purine Biosynthesis                                            | 5 |
|                                  |                                                          | Purine conversions                                                     | 5 |
|                                  | Pyrimidines                                              | Pyrimidine utilization                                                 | 2 |
|                                  |                                                          | pyrimidine conversions                                                 | 3 |
|                                  |                                                          | Alkylphosphonate utilization                                           | 1 |
| Phosphorus Metabolism            | Phosphorus Metabolism                                    | Phosphate metabolism                                                   | 8 |
|                                  |                                                          | Phosphonate metabolism                                                 | 3 |
|                                  |                                                          | Glutathione-regulated potassium-efflux system and associated functions | 7 |

Table S1. Cont.

|                               |                                                   |                                                            |    |
|-------------------------------|---------------------------------------------------|------------------------------------------------------------|----|
| Protein Metabolism            | Protein biosynthesis                              | Asp-tRNA(Asn) transamidation                               | 4  |
|                               |                                                   | Ribosome LSU bacterial                                     | 29 |
|                               |                                                   | Ribosome LSU mitochondrial                                 | 1  |
|                               |                                                   | Ribosome SSU bacterial                                     | 10 |
|                               |                                                   | Ribosome activity modulation                               | 1  |
|                               |                                                   | Translation factors bacterial                              | 1  |
|                               |                                                   | Universal GTPases                                          | 11 |
|                               |                                                   | tRNA aminoacylation                                        | 27 |
|                               |                                                   | Proteasome bacterial                                       | 5  |
|                               |                                                   | Proteasome eukaryotic                                      | 11 |
|                               | Protein folding                                   | Protein degradation                                        | 2  |
|                               |                                                   | Proteolysis in bacteria, ATP-dependent                     | 1  |
|                               |                                                   | GroEL GroES                                                | 1  |
|                               |                                                   | Peptidyl-prolyl cis-trans isomerase                        | 2  |
|                               |                                                   | Periplasmic disulfide interchange                          | 1  |
|                               |                                                   | Protein chaperones                                         | 14 |
|                               | Protein processing and modification               | Inteins                                                    | 1  |
|                               | Secretion                                         | General Secretion Pathway                                  | 10 |
|                               |                                                   | General secretory pathway (Sec-SRP) complex (TC 3.A.5.1.1) | 8  |
|                               |                                                   | Twin-arginine translocation system                         | 1  |
| Regulation and Cell signaling | Programmed Cell Death and Toxin-antitoxin Systems | Toxin-antitoxin systems (other than RelBE and MazEF)       | 1  |
|                               | Proteolytic pathway                               | Coagulation cascade                                        | 5  |
|                               |                                                   | Glutaredoxins                                              | 4  |
|                               |                                                   | MazEF toxin-antitoxing (programmed cell death) system      | 2  |
|                               | Regulation and Cell signaling                     | Phytochromes                                               | 1  |
|                               |                                                   | Two-component regulatory systems in Campylobacter          | 2  |
|                               |                                                   | cAMP signaling in bacteria                                 | 8  |

Table S1. Cont.

|                      |                                                                            |                                                                                                    |    |
|----------------------|----------------------------------------------------------------------------|----------------------------------------------------------------------------------------------------|----|
| Respiration          | ATP synthases                                                              | F0F1-type ATP synthase                                                                             | 11 |
|                      |                                                                            | Anaerobic respiratory reductases                                                                   | 4  |
|                      | Electron accepting reactions                                               | Terminal cytochrome C oxidases                                                                     | 7  |
|                      |                                                                            | Na(+)-translocating NADH-quinone oxidoreductase and rnf-like group of electron transport complexes | 8  |
|                      |                                                                            | NiFe hydrogenase maturation                                                                        | 1  |
|                      |                                                                            | Respiratory Complex I                                                                              | 11 |
|                      |                                                                            | Respiratory dehydrogenases 1                                                                       | 4  |
|                      |                                                                            | Succinate dehydrogenase                                                                            | 1  |
|                      |                                                                            | Biogenesis of c-type cytochromes                                                                   | 2  |
|                      |                                                                            | Biogenesis of cbb3-type cytochrome c oxidases                                                      | 2  |
|                      |                                                                            | Biogenesis of cytochrome c oxidases                                                                | 2  |
|                      |                                                                            | Formate hydrogenase                                                                                | 3  |
|                      |                                                                            | Soluble cytochromes and functionally related electron carriers                                     | 1  |
|                      | Sodium Ion-Coupled Energetics                                              | Na+ translocating decarboxylases and related biotin-dependent enzymes                              | 1  |
| RNA Metabolism       | RNA Metabolism                                                             | Group II intron-associated genes                                                                   | 36 |
|                      |                                                                            | ATP-dependent RNA helicases, bacterial                                                             | 1  |
|                      |                                                                            | Polyadenylation bacterial                                                                          | 3  |
|                      |                                                                            | Queuosine-Archaesine Biosynthesis                                                                  | 4  |
|                      | RNA processing and modification                                            | RNA processing and degradation, bacterial                                                          | 5  |
|                      |                                                                            | eukaryotic rRNA modification and related functions                                                 | 1  |
|                      |                                                                            | rRNA modification Bacteria                                                                         | 1  |
|                      |                                                                            | tRNA modification E.coli                                                                           | 14 |
|                      |                                                                            | tRNA processing                                                                                    | 3  |
|                      | Transcription                                                              | RNA polymerase II                                                                                  | 1  |
|                      |                                                                            | RNA polymerase bacterial                                                                           | 7  |
|                      |                                                                            | Transcription factors bacterial                                                                    | 5  |
| Secondary Metabolism | Plant hormones                                                             | Auxin biosynthesis                                                                                 | 2  |
|                      | Biologically active compounds in metazoan cell defence and differentiation |                                                                                                    |    |
|                      |                                                                            | Quinolinic acid and its derivatives                                                                | 2  |

Table S1. Cont.

|                   |                               |                                                |    |
|-------------------|-------------------------------|------------------------------------------------|----|
| Stress Response   | Cold shock                    | Cold shock, CspA family of proteins            | 1  |
|                   | Osmotic stress                | Hyperosmotic ectoine biosynthesis              | 1  |
|                   |                               | Glutathione Redox Metabolism                   | 1  |
|                   | Oxidative stress              | Oxidative stress                               | 8  |
|                   |                               | Protection from Reactive Oxygen Species        | 1  |
|                   |                               | Acid resistance mechanisms                     | 1  |
|                   |                               | Bacterial hemoglobins                          | 2  |
|                   |                               | Carbon Starvation                              | 2  |
|                   | Stress Response               | Copper homeostasis                             | 10 |
|                   |                               | Dimethylarginine metabolism                    | 1  |
|                   |                               | Flavohaemoglobin                               | 5  |
|                   |                               | Heat shock dnaK gene cluster extended          | 2  |
| Sulfur Metabolism | Inorganic sulfur assimilation | Sulfate assimilation                           | 1  |
|                   |                               | Alkanesulfonate assimilation                   | 1  |
|                   | Organic sulfur assimilation   | Utilization of glutathione as a sulphur source | 1  |
|                   |                               | Galactosylceramide and Sulfatide metabolism    | 3  |
|                   | Sulfur Metabolism             | Sulfate reduction-associated complexes         | 2  |
|                   |                               | Sulfur oxidation                               | 12 |
| Unclassified      | Unclassified                  | Branched chain amino acid degradation regulons | 2  |
|                   |                               | CBSS-224911.1.peg.7673                         | 3  |
|                   |                               | CBSS-393121.3.peg.1913                         | 2  |
|                   |                               | CBSS-412883.3.peg.2513                         | 1  |
|                   |                               | CBSS-83332.1.peg.3803                          | 5  |
|                   |                               | CBSS-87626.3.peg.3639                          | 1  |
|                   |                               | CR clusters Euk 7 GlucoseP isomerase           | 1  |
|                   |                               | Experimental-Ubiquinone BiosynthesisVDC        | 3  |
|                   |                               | Iron-sulfur cluster assembly                   | 9  |
|                   |                               | Iron-sulfur experimental                       | 9  |
|                   |                               | RuvABC plus a hypothetical                     | 3  |
|                   |                               | Selenoprotein O                                | 1  |
|                   |                               | Sugar catabolome in Shewanella species         | 2  |
|                   |                               | YgfZ-Fe-S                                      | 1  |
|                   |                               | YgfZ-Fe-S clustering                           | 1  |
|                   |                               | Zinc regulated enzymes                         | 1  |

Table S1. Cont.

|                                |                                               |                                                     |    |
|--------------------------------|-----------------------------------------------|-----------------------------------------------------|----|
| Virulence, Disease and Defense | Adhesion                                      | Adhesins in Staphylococcus                          | 1  |
|                                | Invasion and intracellular resistance         | Listeria surface proteins: Internalin-like proteins | 2  |
|                                |                                               | Hemin transport system                              | 2  |
|                                | Iron Scavenging Mechanisms                    | Pyoverdine biosynthesis new                         | 1  |
|                                |                                               | Transport of Iron                                   | 1  |
|                                | Pathogenicity islands                         | Staphylococcal pathogenicity islands SaPI           | 1  |
|                                | Posttranslational modification                | N-linked Glycosylation in Bacteria                  | 6  |
|                                |                                               | Acridine resistance cluster                         | 7  |
|                                |                                               | Beta-lactamase                                      | 2  |
|                                | Resistance to antibiotics and toxic compounds | Cobalt-zinc-cadmium resistance                      | 8  |
|                                |                                               | Methicillin resistance in Staphylococci             | 16 |
|                                |                                               | Multidrug Resistance Efflux Pumps                   | 1  |
|                                |                                               | Resistance to fluoroquinolones                      | 5  |
|                                |                                               | ESAT-6 proteins secretion system in Firmicutes      | 1  |
|                                | Type III, Type IV, ESAT secretion systems     | Mannose-sensitive hemagglutinin type 4 pilus        | 1  |
|                                |                                               | Type 4 secretion and conjugative transfer           | 20 |
|                                |                                               | Type III secretion system orphans                   | 1  |
|                                |                                               | Type IV pilus                                       | 6  |
|                                | Virulence                                     | C jejuni colonization of chick caeca                | 1  |
|                                |                                               | Ton and Tol transport systems                       | 5  |

**Table S2.** Distribution of transcripts annotated according to the COG in MG-RAST. Transcript gene function was assigned in MG-RAST, with the following parameters: maximum e-value of  $10^{-5}$ , minimum of 50% identity cutoff and minimum alignment cutoff of 50.

| Major Categories                   | Description                                                   | # Hits |
|------------------------------------|---------------------------------------------------------------|--------|
| CELLULAR PROCESSES AND SIGNALING   | Cell cycle control, cell division, chromosome partitioning    | 4      |
|                                    | Cell wall/membrane/envelope biogenesis                        | 25     |
|                                    | Defense mechanisms                                            | 4      |
|                                    | Intracellular trafficking, secretion, and vesicular transport | 12     |
|                                    | Posttranslational modification, protein turnover, chaperones  | 27     |
|                                    | Signal transduction mechanisms                                | 10     |
| INFORMATION STORAGE AND PROCESSING | RNA processing and modification                               | 1      |
|                                    | Replication, recombination and repair                         | 30     |
|                                    | Transcription                                                 | 11     |
|                                    | Translation, ribosomal structure and biogenesis               | 52     |
| METABOLISM                         | Amino acid transport and metabolism                           | 42     |
|                                    | Carbohydrate transport and metabolism                         | 21     |
|                                    | Coenzyme transport and metabolism                             | 28     |
|                                    | Energy production and conversion                              | 45     |
|                                    | Inorganic ion transport and metabolism                        | 18     |
|                                    | Lipid transport and metabolism                                | 14     |
|                                    | Nucleotide transport and metabolism                           | 20     |
|                                    | Secondary metabolites biosynthesis, transport and catabolism  | 2      |
| POORLY CHARACTERIZED               | Function unknown                                              | 6      |
|                                    | General function prediction only                              | 44     |
